# Supplementary material
Source: Springer Nature journal article supplement (https://www.springermedizin.de/resource/supplementary/12967_2009_353_MOESM4_ESM.pdf/9576286)

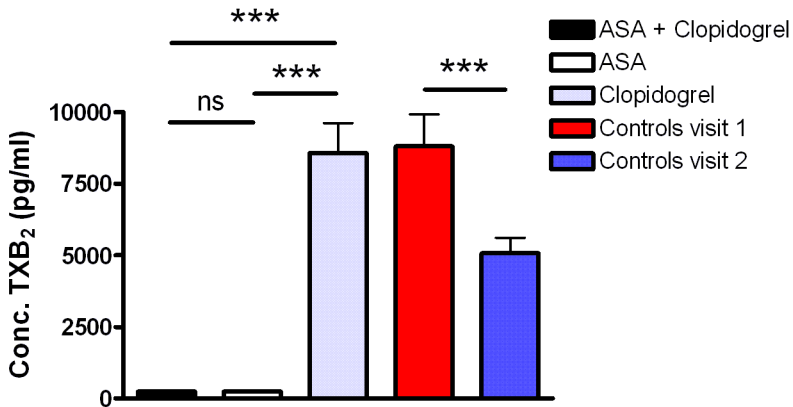

Supplement: MOESM4 [file 9576286]
